# Supplementary material for: Effects of Egg Consumption on Subjects with SLD or Hypertension: A MICOL Study
Source: MDPI journal article supplement (doi:10.3390/nu16030430), 2024-01-31
Supplement: s1 [file s1]

**Table S1.** Blood characteristics of patients with SLD or HTN.

| Parameters *          | Disease Condition |              |              |              | p ^    | Multiple Comparisons <sup>ψ</sup> |            |            |            |            |            |
|-----------------------|-------------------|--------------|--------------|--------------|--------|-----------------------------------|------------|------------|------------|------------|------------|
|                       | SLD (No) /        | SLD (No) /   | SLD (Yes) /  | SLD (Yes)/   |        | (b) vs (a)                        | (c) vs (a) | (d) vs (a) | (c) vs (b) | (d) vs (b) | (d) vs (c) |
|                       | HTN (No)          | HTN (Yes)    | HTN (No)     | HTN (Yes)    |        |                                   |            |            |            |            |            |
|                       | (n=236)           | (n=176)      | (n=209)      | (n=287)      |        |                                   |            |            |            |            |            |
|                       | (a)               | (b)          | (c)          | (d)          |        |                                   |            |            |            |            |            |
| Glucose (mg/dL)       | 92.60±17.16       | 99.00±18.10  | 100.62±18.72 | 112.74±40.26 | 0.0001 | <0.0001                           | <0.0001    | <0.0001    | 0.15       | <0.0001    | 0.0001     |
| Cholesterol (mg/mL)   | 195.23±35.78      | 184.66±37.29 | 198.99±37.76 | 185.10±38.26 | 0.0001 | 0.001                             | 0.27       | 0.001      | 0.0002     | 0.36       | 0.0002     |
| HDL (mg/dL)           | 54.22±14.16       | 51.10±13.14  | 46.89±11.65  | 45.89±11.26  | 0.0001 | 0.009                             | <0.0001    | <0.0001    | 0.0005     | <0.0001    | 0.20       |
| LDL (mg/dL)           | 126.26±30.78      | 115.69±31.61 | 129.31±33.05 | 115.15±33.36 | 0.0001 | 0.002                             | 0.23       | 0.0003     | 0.0003     | 0.47       | <0.0001    |
| Triglycerides (mg/dL) | 81.80±50.29       | 91.47±47.69  | 116.68±61.20 | 131.16±71.08 | 0.0001 | 0.01                              | <0.0001    | <0.0001    | <0.0001    | <0.0001    | 0.01       |
| Insulin (U/L)         | 6.39±13.13        | 11.59±62.62  | 9.48±9.12    | 11.23±8.19   | 0.0001 | 0.0007                            | <0.0001    | <0.0001    | <0.0001    | <0.0001    | 0.0006     |
| HOMA-IR               | 1.58±4.60         | 3.27±20.00   | 2.49±3.16    | 3.25±3.04    | 0.0001 | 0.0001                            | <0.0001    | <0.0001    | <0.0001    | <0.0001    | <0.0001    |
| RBC (M/mcL)           | 4.86±0.50         | 4.76±0.59    | 4.97±0.52    | 4.83±0.50    | 0.0003 | 0.08                              | 0.001      | 0.43       | <0.0001    | 0.10       | 0.0005     |
| Hemoglobin (g/dL)     | 14.03±1.49        | 13.59±1.68   | 14.32±1.53   | 13.96±1.48   | 0.0001 | 0.005                             | 0.007      | 0.32       | <0.0001    | 0.01       | 0.001      |
| HCT (%)               | 41.72±3.61        | 42.79±3.37   | 43.10±3.39   | 43.13±3.74   | 0.002  | 0.04                              | 0.0003     | 0.003      | 0.28       | 0.38       | 0.36       |
| MCV (fL)              | 85.37±7.74        | 84.81±8.46   | 84.95±5.85   | 86.50±5.23   | 0.04   | 0.10                              | 0.01       | 0.31       | 0.42       | 0.06       | 0.007      |
| MCH (pg)              | 28.82±2.79        | 28.63±3.30   | 29.04±2.31   | 29.44±2.02   | 0.40   | 0.31                              | 0.31       | 0.08       | 0.21       | 0.07       | 0.17       |
| MCHC (g/dL)           | 33.75±1.08        | 33.71±1.20   | 34.17±1.12   | 34.03±1.04   | 0.005  | 0.37                              | 0.0003     | 0.02       | 0.03       | 0.12       | 0.17       |
| RDW-CV (%)            | 13.67±1.20        | 13.77±1.61   | 13.54±0.95   | 13.71±1.06   | 0.63   | 0.45                              | 0.25       | 0.23       | 0.37       | 0.26       | 0.09       |
| Platelets (K/mcL)     | 229.64±58.47      | 220.40±59.56 | 228.95±52.08 | 224.68±62.65 | 0.11   | 0.02                              | 0.49       | 0.08       | 0.02       | 0.22       | 0.08       |
| WBC (K/mcL)           | 5.77±2.78         | 5.81±1.58    | 5.88±1.32    | 6.35±2.20    | 0.0001 | 0.14                              | 0.006      | <0.0001    | 0.10       | 0.0002     | 0.009      |
| Neutrophils (%)       | 57.17±8.92        | 58.74±8.50   | 56.32±8.57   | 58.71±8.06   | 0.26   | 0.27                              | 0.10       | 0.27       | 0.07       | 0.43       | 0.04       |
| Lymphocytes (%)       | 32.44±8.93        | 30.87±7.82   | 33.21±8.47   | 30.72±7.17   | 0.28   | 0.30                              | 0.11       | 0.25       | 0.09       | 0.48       | 0.04       |

(continue)

1

2

3

| Parameters *                              | Disease Condition |            |             |            | p ^    | Multiple Comparisons <sup>ψ</sup> |            |            |            |            |            |
|-------------------------------------------|-------------------|------------|-------------|------------|--------|-----------------------------------|------------|------------|------------|------------|------------|
|                                           | SLD (No) /        | SLD (No) / | SLD (Yes) / | SLD (Yes)/ |        | (b) vs (a)                        | (c) vs (a) | (d) vs (a) | (c) vs (b) | (d) vs (b) | (d) vs (c) |
|                                           | HTN (No)          | HTN (Yes)  | HTN (No)    | HTN (Yes)  |        |                                   |            |            |            |            |            |
|                                           | (n=236)           | (n=176)    | (n=209)     | (n=287)    |        |                                   |            |            |            |            |            |
|                                           | (a)               | (b)        | (c)         | (d)        |        |                                   |            |            |            |            |            |
| Eosinophils (%)                           | 2.71±1.55         | 2.87±1.67  | 2.73±1.64   | 2.54±1.17  | 0.81   | 0.23                              | 0.38       | 0.37       | 0.18       | 0.19       | 0.48       |
| Monocytes (%)                             | 7.10±1.56         | 6.89±1.54  | 7.25±1.61   | 7.51±2.03  | 0.36   | 0.23                              | 0.21       | 0.10       | 0.10       | 0.06       | 0.31       |
| Basophils (%)                             | 0.58±0.34         | 0.62±0.36  | 0.49±0.24   | 0.51±0.28  | 0.08   | 0.33                              | 0.01       | 0.11       | 0.03       | 0.10       | 0.23       |
| Neutrophils (10 <sup>3</sup> /μL)         | 3.24±1.04         | 3.35±1.15  | 3.40±0.92   | 3.93±2.57  | 0.01   | 0.28                              | 0.05       | 0.0004     | 0.29       | 0.04       | 0.04       |
| Lymphocytes (10 <sup>3</sup> /μL)         | 1.98±2.93         | 1.72±0.58  | 1.99±0.66   | 1.90±0.50  | 0.002  | 0.36                              | 0.0005     | 0.007      | 0.005      | 0.02       | 0.30       |
| Monocytes (10 <sup>3</sup> /μL)           | 0.39±0.12         | 0.38±0.13  | 0.43±0.13   | 0.48±0.17  | 0.0001 | 0.31                              | 0.002      | <0.0001    | 0.009      | 0.0006     | 0.09       |
| Eosinophils (10 <sup>3</sup> /μL)         | 0.15±0.09         | 0.16±0.11  | 0.16±0.11   | 0.15±0.07  | 0.49   | 0.20                              | 0.17       | 0.07       | 0.42       | 0.40       | 0.27       |
| Basophils (10 <sup>3</sup> /μL)           | 0.03±0.02         | 0.03±0.02  | 0.03±0.02   | 0.03±0.02  | 0.66   | 0.36                              | 0.20       | 0.34       | 0.18       | 0.47       | 0.13       |
| HbA1c (%)                                 | 35.43±7.15        | 36.49±7.43 | 38.21±6.20  | 40.09±8.70 | 0.0001 | 0.26                              | 0.0003     | <0.0001    | 0.05       | 0.007      | 0.11       |
| Fractional Total Bilirubinemia (mg/dL)    | 0.75±0.47         | 0.65±0.26  | 0.67±0.32   | 0.70±0.31  | 0.41   | 0.14                              | 0.06       | 0.28       | 0.44       | 0.28       | 0.19       |
| Direct fractional bilirubinemia (mg/dL)   | 0.16±0.05         | 0.15±0.05  | 0.15±0.04   | 0.16±0.05  | 0.73   | 0.21                              | 0.15       | 0.27       | 0.49       | 0.38       | 0.36       |
| Indirect fractional bilirubinemia (mg/dL) | 0.49±0.27         | 0.43±0.25  | 0.48±0.27   | 0.51±0.28  | 0.82   | 0.27                              | 0.43       | 0.40       | 0.37       | 0.17       | 0.35       |

|            |             |             |             |             |        |      |        |         |        |         |       |
|------------|-------------|-------------|-------------|-------------|--------|------|--------|---------|--------|---------|-------|
| GOT (U/L)  | 22.27±12.91 | 22.13±9.39  | 21.21±6.11  | 23.39±10.34 | 0.08   | 0.37 | 0.43   | 0.01    | 0.44   | 0.04    | 0.02  |
| SGPT (U/L) | 20.88±10.96 | 20.66±11.42 | 22.49±9.09  | 25.90±15.44 | 0.0001 | 0.45 | 0.0005 | <0.0001 | 0.0008 | <0.0001 | 0.004 |
| GGT (U/I)  | 17.00±12.22 | 20.52±18.85 | 20.52±17.31 | 22.99±22.35 | 0.0001 | 0.06 | 0.0003 | <0.0001 | 0.05   | 0.001   | 0.09  |

(continue) 6

| Parameters *        | Disease Condition |               |                |                | p ^    | Multiple Comparisons <sup>ψ</sup> |            |            |            |            |            |
|---------------------|-------------------|---------------|----------------|----------------|--------|-----------------------------------|------------|------------|------------|------------|------------|
|                     | SLD (No) /        | SLD (No) /    | SLD (Yes) /    | SLD (Yes)/     |        | (b) vs (a)                        | (c) vs (a) | (d) vs (a) | (c) vs (b) | (d) vs (b) | (d) vs (c) |
|                     | HTN (No)          | HTN (Yes)     | HTN (No)       | HTN (Yes)      |        |                                   |            |            |            |            |            |
|                     | (n=236)           | (n=176)       | (n=209)        | (n=287)        |        |                                   |            |            |            |            |            |
|                     | (a)               | (b)           | (c)            | (d)            |        |                                   |            |            |            |            |            |
| Albumin (%)         | 4.14±0.25         | 4.11±0.24     | 4.16±0.25      | 4.11±0.24      | 0.47   | 0.14                              | 0.42       | 0.15       | 0.12       | 0.38       | 0.12       |
| Iron (mg/dL)        | 90.88±31.16       | 86.84±31.59   | 89.41±31.16    | 90.80±30.65    | 0.97   | 0.36                              | 0.36       | 0.49       | 0.46       | 0.38       | 0.39       |
| Urea (mg/dL)        | 37.89±9.70        | 43.52±14.25   | 37.75±9.34     | 42.67±12.21    | 0.0001 | <0.0001                           | 0.47       | <0.0001    | <0.0001    | 0.32       | <0.0001    |
| Creatinine (mg/dL)  | 0.76±0.22         | 1.01±0.89     | 0.79±0.15      | 0.85±0.21      | 0.0001 | <0.0001                           | 0.01       | 0.0001     | 0.01       | 0.14       | 0.07       |
| eGFR (mL/min)       | 86.53±8.37        | 83.05±15.17   | 85.56±8.18     | 82.32±11.76    | 0.06   | 0.08                              | 0.21       | 0.005      | 0.20       | 0.31       | 0.03       |
| AAT (mg/dL)         | 192.44±37.34      | 186.32±37.79  | 194.32±43.44   | 191.19±36.91   | 0.71   | 0.16                              | 0.42       | 0.37       | 0.13       | 0.24       | 0.30       |
| Folate (ng/mL)      | 8.40±4.61         | 9.44±5.48     | 8.20±5.28      | 9.31±5.90      | 0.01   | 0.04                              | 0.12       | 0.08       | 0.002      | 0.29       | 0.005      |
| Vitamin B12 (pg/ml) | 370.82±596.64     | 412.47±690.87 | 321.72±170.85  | 388.41±674.07  | 0.35   | 0.04                              | 0.39       | 0.35       | 0.08       | 0.08       | 0.47       |
| TSH (mUI/mL)        | 1139.08±1715.89   | 358.23±860.36 | 979.46±1178.61 | 484.11±1124.00 | 0.0001 | <0.0001                           | 0.47       | <0.0001    | <0.0001    | 0.26       | <0.0001    |
| FT3 (pg/mL)         | 3.29±0.47         | 3.17±0.41     | 3.33±0.51      | 3.25±0.51      | 0.001  | 0.003                             | 0.09       | 0.18       | <0.0001    | 0.02       | 0.01       |
| FT4 (ng/mL)         | 0.86±0.16         | 0.88±0.15     | 0.91±0.64      | 0.88±0.19      | 0.24   | 0.24                              | 0.25       | 0.10       | 0.09       | 0.34       | 0.03       |
| CRP (mg/L)          | 0.16±0.16         | 0.17±0.24     | 0.27±0.33      | 0.39±0.84      | 0.001  | 0.39                              | 0.0001     | <0.0001    | 0.01       | 0.0004     | 0.04       |

\* As Mean and Standard Deviation for continuous variables, and as frequency and percentage (%) for categorical. ^ Kruskal-Wallis equality of populations rank test; <sup>‡</sup> Chi-Square test; <sup>ψ</sup> Dunn's test of multiple comparisons; <sup>†</sup> Proportion test. Abbreviations: SLD, Steatotic Liver Disease; HTN, Hypertension; HDL, High-Density Lipoprotein; LDL, Low-Density Lipoprotein; HOMA-IR, Homeostasis Model Assessment-Estimated Insulin Resistance; RBC, Red Blood Cell; HCT, Hematocrit (he-MAT-uh-krit); MCV, Mean Corpuscular Volume; MCH, Mean Corpuscular Hemoglobin; MCHC, Mean Corpuscular Hemoglobin Concentration; RDW-CV, Red Cell Distribution Width; WBC, White Blood Cells; HbA1c, Hemoglobin A1c; GOT, Aspartate Aminotransferase; SGPT, Serum Glutamic Pyruvic Transaminase; GGT, Gamma-Glutamyl Transferase; eGFR, Estimated Glomerular Filtration Rate; AAT, Alpha-1-Antitrypsin; TSH, Thyroid Stimulating Hormone; FT3, Free Triiodothyronine; FT4, Thyroxine; PCR, CRP, C-Reactive Protein.

**Table S2.** Nutrients (mg/die) eggs intake by disease condition.

| Nutrients *      | Disease Condition      |                         |                         |                          |
|------------------|------------------------|-------------------------|-------------------------|--------------------------|
|                  | SLD (No) /<br>HTN (No) | SLD (No) /<br>HTN (Yes) | SLD (Yes) /<br>HTN (No) | SLD (Yes) /<br>HTN (Yes) |
|                  | (n=236)                | (n=176)                 | (n=209)                 | (n=287)                  |
| <i>Nutrients</i> |                        |                         |                         |                          |
| Iron             | 0.16±0.15              | 0.11±0.10               | 0.14±0.13               | 0.12±0.11                |
| Calcium          | 5.00±4.73              | 3.47±3.35               | 4.55±4.21               | 3.75±3.66                |
| Sodium           | 14.29±13.49            | 9.91±9.56               | 12.98±12.01             | 10.71±10.46              |
| Potassium        | 13.87±13.10            | 9.62±9.28               | 12.60±11.66             | 10.39±10.15              |
| Phosphorus       | 21.90±20.68            | 15.18±14.65             | 19.90±18.41             | 16.41±16.03              |
| Zinc             | 0.12±0.12              | 0.09±0.08               | 0.11±0.10               | 0.09±0.09                |
| Magnesium        | 1.35±1.28              | 0.94±0.91               | 1.23±1.14               | 1.02±0.99                |
| Copper           | 0.01±0.006             | 0.004±0.004             | 0.006±0.005             | 0.005±0.004              |
| Selenium         | 0.60±0.57              | 0.42±0.40               | 0.55±0.51               | 0.45±0.44                |
| Chlorine         | 16.68±15.76            | 11.57±11.16             | 15.16±14.03             | 12.50±12.21              |
| Iodine           | 5.53±5.22              | 3.83±3.70               | 5.02±4.65               | 4.14±4.04                |
| Sulfur           | 18.77±17.73            | 13.01±12.56             | 17.06±15.78             | 14.07±13.74              |
| Vitamin B1       | 0.09±0.009             | 0.006±0.006             | 0.008±0.008             | 0.007±0.007              |
| Vitamin B2       | 0.03±0.03              | 0.02±0.02               | 0.03±0.03               | 0.02±0.02                |
| Niacin           | 0.01±0.01              | 0.007±0.007             | 0.009±0.009             | 0.008±0.007              |
| Vitamin B6       | 0.01±0.01              | 0.009±0.008             | 0.01±0.01               | 0.009±0.009              |

(continue)

| Nutrients *                       | Disease Condition   |                      |                     |                      |
|-----------------------------------|---------------------|----------------------|---------------------|----------------------|
|                                   | SLD (No) /          | SLD (No) /           | SLD (Yes) /         | SLD (Yes) /          |
|                                   | HTN (No)<br>(n=236) | HTN (Yes)<br>(n=176) | HTN (No)<br>(n=209) | HTN (Yes)<br>(n=287) |
| Total Folates                     | 5.21±4.92           | 3.61±3.49            | 4.74±4.38           | 3.91±3.82            |
| Pantothenic Acid                  | 0.18±0.17           | 0.13±0.12            | 0.17±0.15           | 0.14±0.13            |
| Biotin                            | 2.08±1.97           | 1.45±1.39            | 1.89±1.75           | 1.56±1.53            |
| Vitamin B12                       | 0.26±0.25           | 0.18±0.17            | 0.24±0.22           | 0.19±0.19            |
| Vitamin A                         | 22.00±20.78         | 15.26±14.72          | 20.00±18.50         | 16.49±16.10          |
| Vitamin E                         | 0.11±0.11           | 0.08±0.08            | 0.10±0.10           | 0.09±0.08            |
| Vitamin D                         | 0.18±0.17           | 0.13±0.12            | 0.16±0.15           | 0.14±0.13            |
| <i>Fatty acids</i>                |                     |                      |                     |                      |
| Total Saturated Fatty Acids       | 0.33±0.31           | 0.23±0.22            | 0.30±0.28           | 0.25±0.24            |
| Myristic Acid                     | 0.003±0.003         | 0.002±0.002          | 0.003±0.003         | 0.002±0.002          |
| Palmitic Acid                     | 0.20±0.19           | 0.14±0.13            | 0.18±0.17           | 0.15±0.14            |
| Stearic Acid                      | 0.13±0.12           | 0.09±0.08            | 0.11±0.11           | 0.09±0.09            |
| Total Monounsaturated Fatty Acids | 0.27±0.25           | 0.19±0.18            | 0.24±0.23           | 0.20±0.20            |
| Palmitoleic Acid                  | 0.02±0.02           | 0.02±0.02            | 0.02±0.02           | 0.02±0.02            |
| Oleic Acid                        | 0.24±0.23           | 0.17±0.16            | 0.22±0.21           | 0.18±0.18            |
| Total Polyunsaturated Fatty Acids | 0.13±0.12           | 0.09±0.09            | 0.12±0.11           | 0.10±0.10            |
| Linoleic Acid                     | 0.11±0.10           | 0.08±0.07            | 0.10±0.09           | 0.08±0.08            |
| Linolenic Acid                    | 0.004±0.004         | 0.003±0.003          | 0.004±0.03          | 0.003±0.003          |
| Arachidonic Acid                  | 0.02±0.01           | 0.01±0.01            | 0.01±0.01           | 0.01±0.01            |

(continue)

| Nutrients *       | Disease Condition |               |               |               |
|-------------------|-------------------|---------------|---------------|---------------|
|                   | SLD (No) /        | SLD (No) /    | SLD (Yes) /   | SLD (Yes) /   |
|                   | HTN (No)          | HTN (Yes)     | HTN (No)      | HTN (Yes)     |
|                   | (n=236)           | (n=176)       | (n=209)       | (n=287)       |
| <i>Aminoacids</i> |                   |               |               |               |
| Tryptophan        | 20.54±19.40       | 14.24±13.74   | 18.67±17.27   | 15.40±15.03   |
| Threonine         | 64.97±61.37       | 45.05±43.46   | 59.05±54.61   | 48.69±47.55   |
| Isoleucine        | 68.51±64.72       | 47.50±45.83   | 62.27±57.60   | 51.35±50.14   |
| Leucine           | 108.56±102.54     | 75.27±72.62   | 98.66±91.26   | 81.37±79.45   |
| Lysine            | 91.77±86.68       | 63.63±61.39   | 83.40±77.15   | 68.78±67.16   |
| Methionine        | 45.57±43.05       | 31.60±30.49   | 41.42±38.31   | 34.16±33.35   |
| Cystine           | 33.68±31.82       | 23.35±22.53   | 30.61±28.32   | 25.25±24.65   |
| Phenylalanine     | 68.04±65.21       | 47.87±46.18   | 62.74±58.03   | 51.74±50.52   |
| Tyrosine          | 52.45±49.55       | 36.37±35.09   | 47.67±44.09   | 39.31±38.39   |
| Valina            | 85.82±81.07       | 59.51±57.41   | 78.00±72.15   | 64.33±62.81   |
| Arginine          | 79.98±75.55       | 55.46±53.51   | 72.69±67.24   | 59.95±58.54   |
| Histidine         | 31.08±29.35       | 21.55±20.79   | 28.24±26.12   | 23.29±22.74   |
| Alanine           | 74.98±70.82       | 51.99±50.16   | 68.14±63.03   | 56.20±54.88   |
| Aspartic Acid     | 126.08±119.09     | 87.42±84.34   | 114.59±105.99 | 94.50±92.27   |
| Glutamic Acid     | 157.26±148.54     | 109.04±105.20 | 142.92±132.20 | 117.87±115.09 |
| Glycine           | 43.38±40.98       | 30.08±29.02   | 39.43±36.47   | 32.51±31.75   |
| Proline           | 51.72±48.86       | 35.86±34.60   | 47.01±43.48   | 38.77±37.86   |
| Serine            | 87.81±82.94       | 60.88±58.74   | 79.80±73.81   | 65.81±64.26   |

\* As Mean and Standard Deviation (M±SD).
